# Supplementary material
Source: MDPI journal article supplement (https://www.mdpi.com/2227-9040/10/10/382)
Supplement: s1 [file s1]

**Copper-induced Fluorescence Quenching in a *Bis*[2-(2'-hydroxyphenyl)benzoxazole]pyridinium  
Derivative for Quantification of Cu<sup>2+</sup> in Solution**

Supporting Information

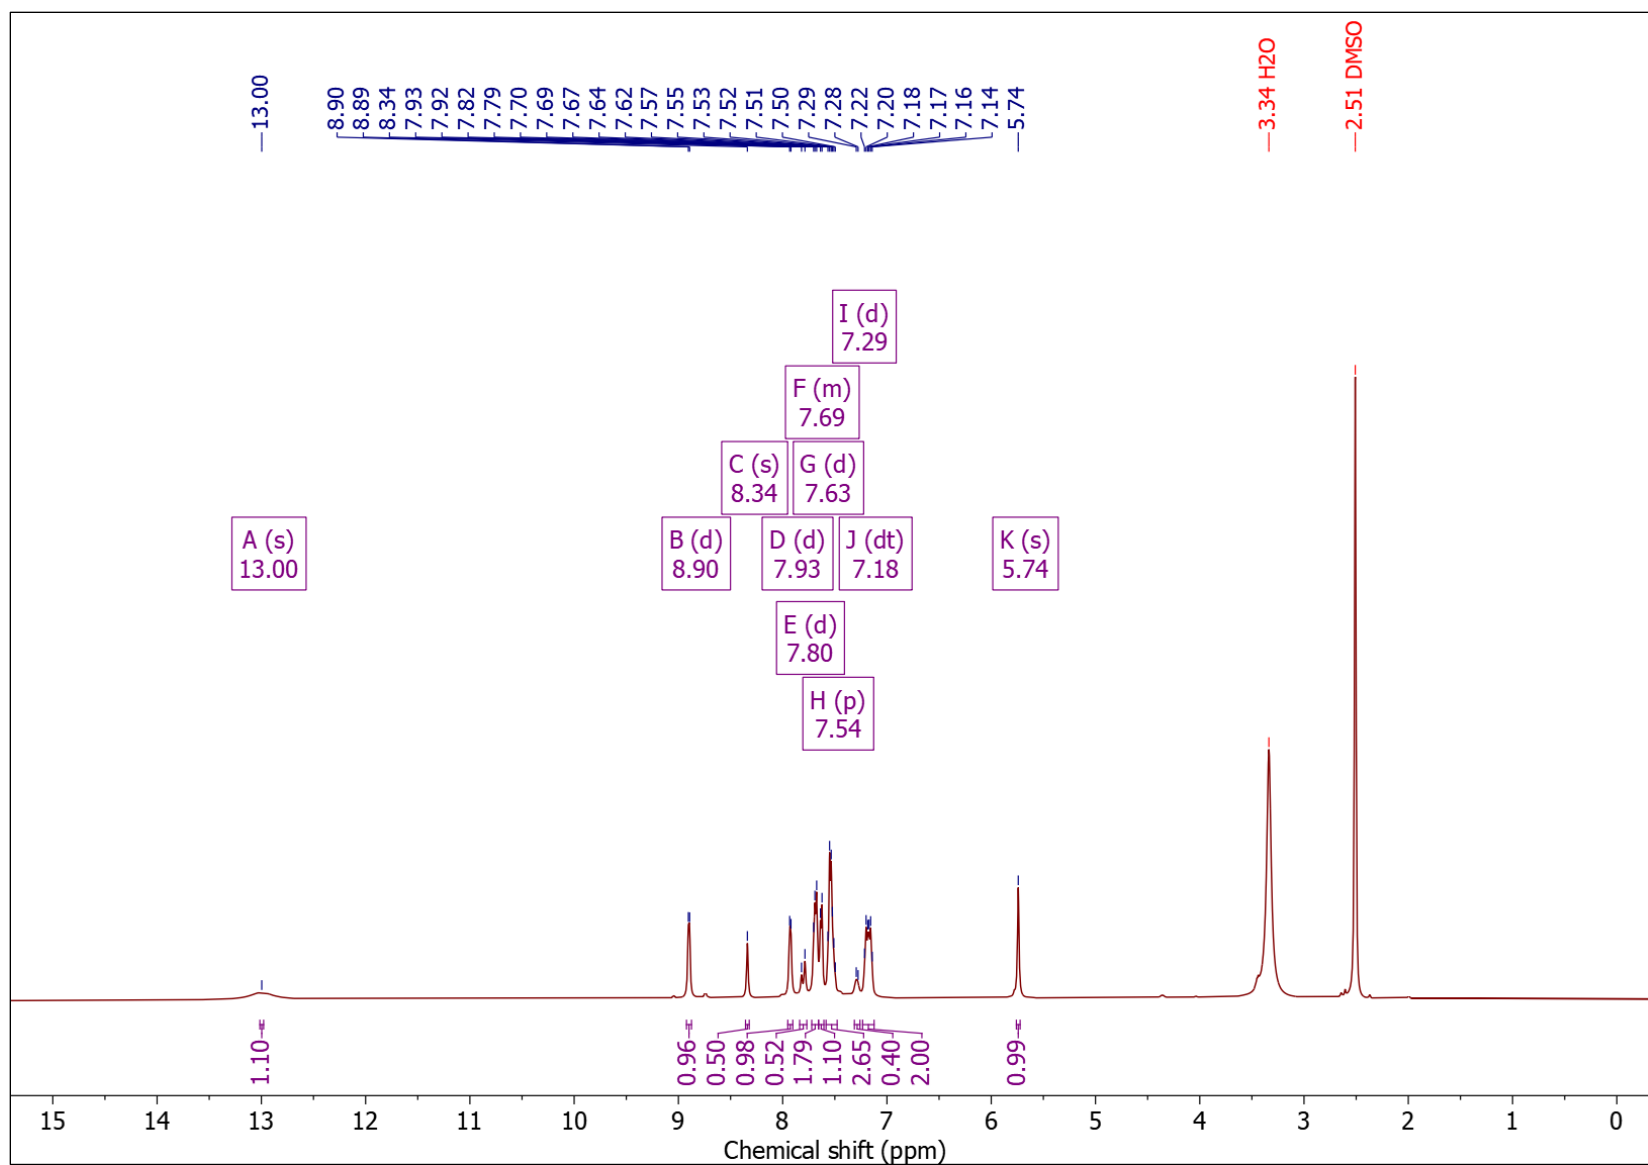

Figure S1.1  $^1\text{H}$  NMR spectra of **2** (500 MHz in DMSO- $d_6$ ).

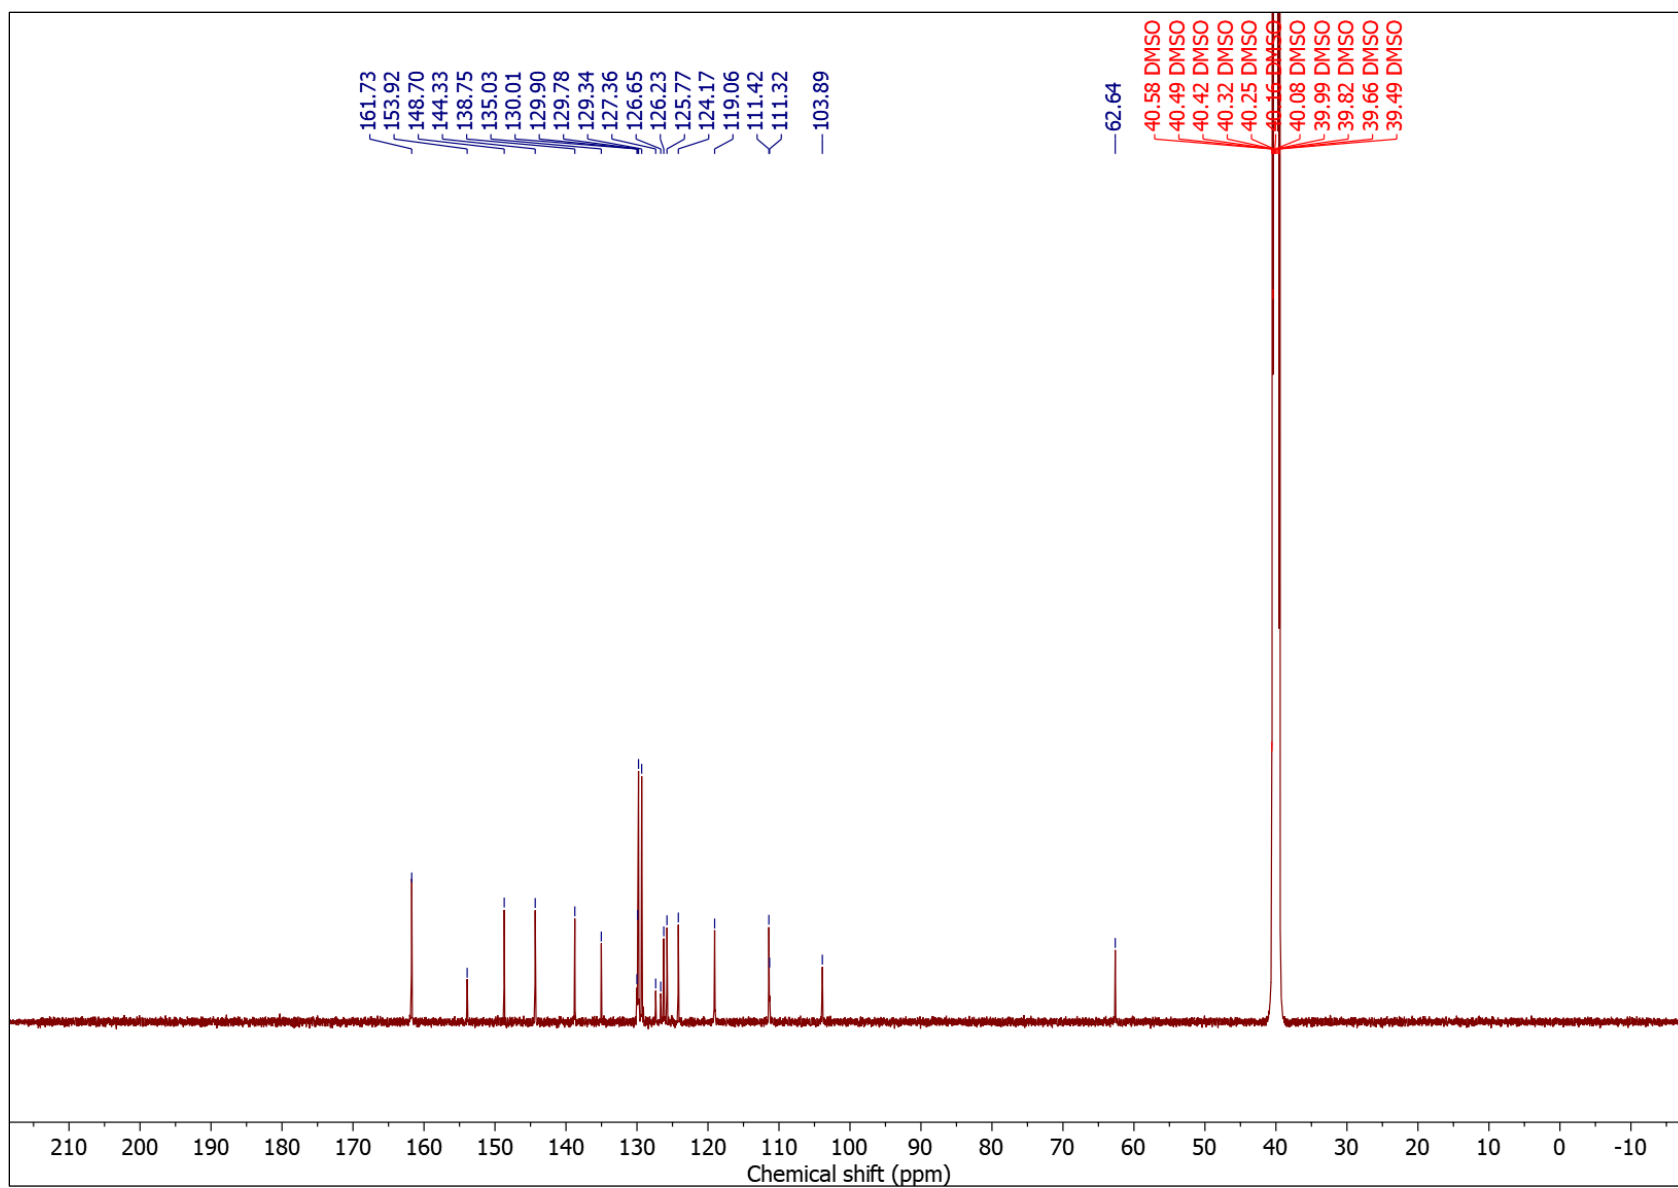

**Figure S1.2** <sup>13</sup>C NMR spectra of **2** (126 MHz in DMSO-*d*<sub>6</sub>).

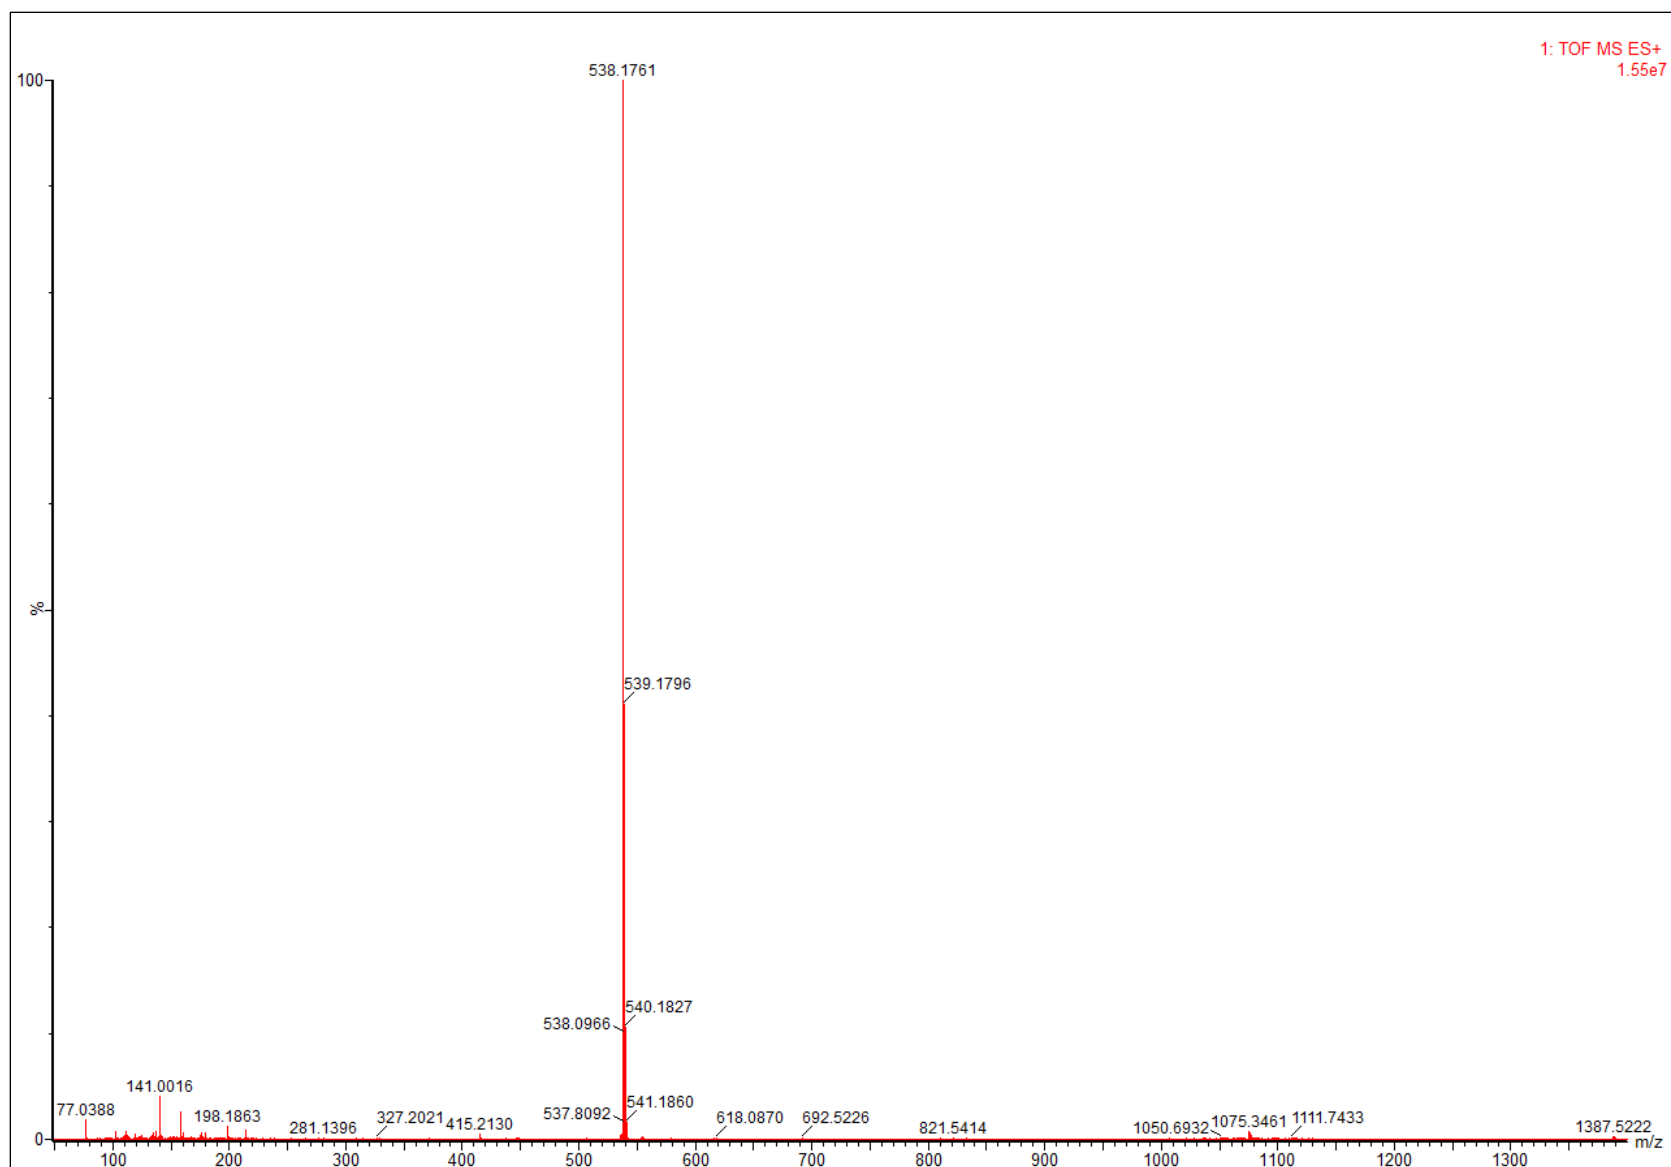

**Figure S1.3** High-resolution mass spectra (TOF MS ES+) of **2**.

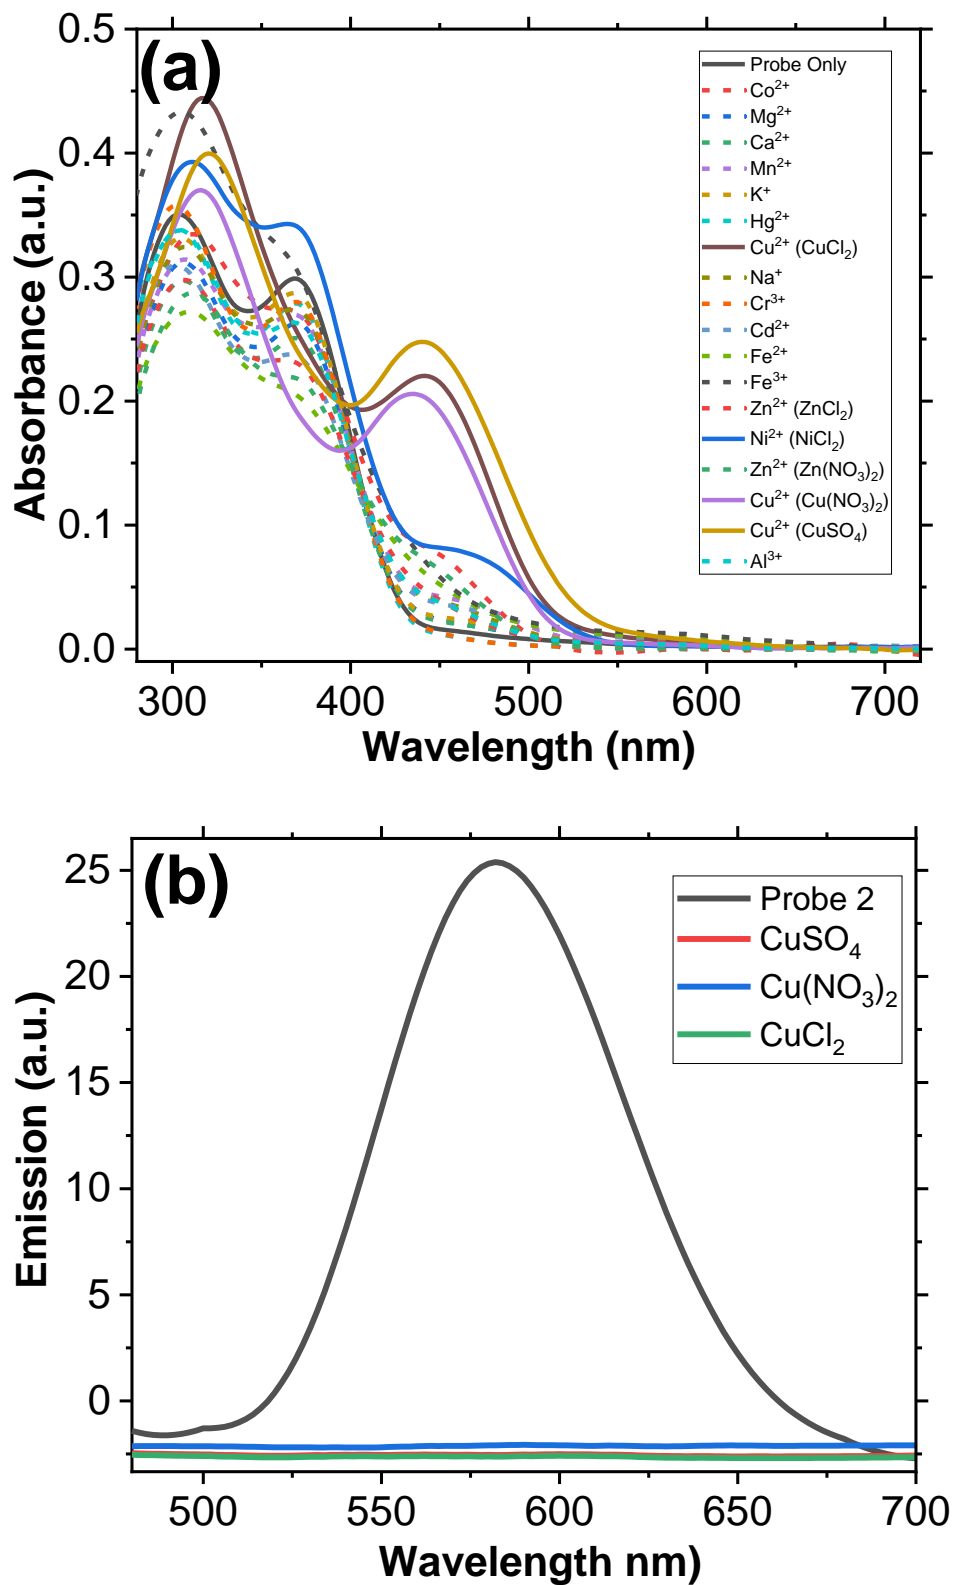

**Figure S2.** Absorbance (a) and emission (b) spectra recorded for probe 2 ( $1 \times 10^{-5}$  M) in acetonitrile upon addition of 10 equivalence of different  $\text{Cu}^{2+}$  species at room temperature.

**Table S1.1 LOD and LOQ calculation based on ratiometric absorbance ( $A_{440}/A_{370}$ ) Data**

SUMMARY OUTPUT

| <i>Regression Statistics</i> |          |
|------------------------------|----------|
| Multiple R                   | 0.997065 |
| R Square                     | 0.994139 |
| Adjusted R Square            | 0.993488 |
| Standard Error               | 0.02914  |
| Observations                 | 11       |

| ANOVA      |           |           |           |          |                       |
|------------|-----------|-----------|-----------|----------|-----------------------|
|            | <i>df</i> | <i>SS</i> | <i>MS</i> | <i>F</i> | <i>Significance F</i> |
| Regression | 1         | 1.296204  | 1.296204  | 1526.511 | 2.34E-11              |
| Residual   | 9         | 0.007642  | 0.000849  |          |                       |
| Total      | 10        | 1.303846  |           |          |                       |

|              | <i>Coefficients</i> | <i>Standard Error</i> | <i>t Stat</i> | <i>P-value</i> | <i>Lower 95%</i> | <i>Upper 95%</i> | <i>Lower 95.0%</i> | <i>Upper 95.0%</i> |
|--------------|---------------------|-----------------------|---------------|----------------|------------------|------------------|--------------------|--------------------|
| Intercept    | 0.047079            | 0.016437              | 2.864174      | 0.018653       | 0.009895         | 0.084262         | 0.009895           | 0.084262           |
| X Variable 1 | 1.085526            | 0.027784              | 39.07058      | 2.34E-11       | 1.022675         | 1.148378         | 1.022675           | 1.148378           |

***SE Intercept*      *0.016437***  
***SD Intercept*      *0.004956***  
***Slope*                *0.10855***

**LOD                0.150665**  
**LOQ                0.45656**

**Table S1.2 LOD and LOQ calculation based on ratiometric fluorescence data ( $I_{585}/I_{585}$ )**

SUMMARY OUTPUT

| <i>Regression Statistics</i> |          |
|------------------------------|----------|
| Multiple R                   | 0.995593 |
| R Square                     | 0.991206 |
| Adjusted R Square            | 0.989007 |
| Standard Error               | 0.032597 |
| Observations                 | 6        |

ANOVA

|            | <i>df</i> | <i>SS</i> | <i>MS</i> | <i>F</i> | <i>Significance F</i> |
|------------|-----------|-----------|-----------|----------|-----------------------|
| Regression | 1         | 0.47903   | 0.47903   | 450.8357 | 2.91E-05              |
| Residual   | 4         | 0.00425   | 0.001063  |          |                       |
| Total      | 5         | 0.48328   |           |          |                       |

|              | <i>Coefficients</i> | <i>Standard Error</i> | <i>t Stat</i> | <i>P-value</i> | <i>Lower 95%</i> | <i>Upper 95%</i> | <i>Lower 95.0%</i> | <i>Upper 95.0%</i> |
|--------------|---------------------|-----------------------|---------------|----------------|------------------|------------------|--------------------|--------------------|
| Intercept    | 0.958402            | 0.023592              | 40.62459      | 2.19E-06       | 0.892901         | 1.023903         | 0.892901           | 1.023903           |
| X Variable 1 | -0.08272            | 0.003896              | -21.2329      | 2.91E-05       | -0.09354         | -0.07191         | -0.09354           | -0.07191           |

**SE Intercept**                      **0.023592**  
**SD Intercept**                      **0.009631**  
**Slope**                                **0.0827**

**LOD**                                **0.384319**  
**LOQ**                                **1.164602**

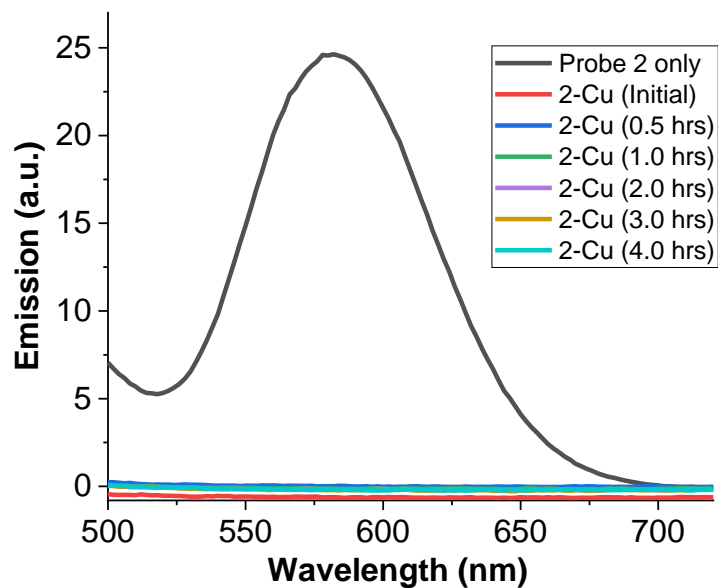

**Figure S3** The evaluation of the stability of the **2-Cu** complex ( 10  $\mu$ M in acetonitrile) by fluorescence analysis at room temperature.

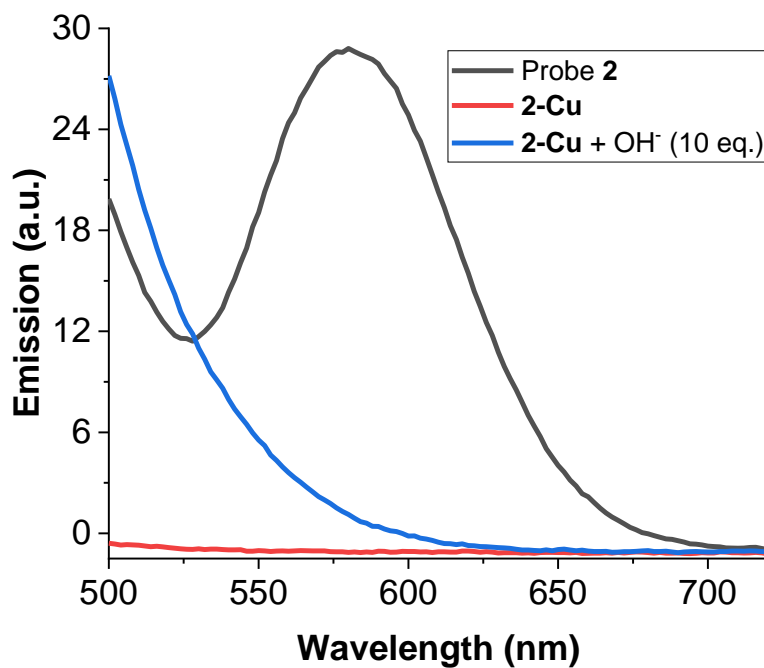

**Figure S4** The evaluation of the stability of the **2-Cu** complex (10  $\mu$ M in acetonitrile) by fluorescence in the presence of strong base (NaOH) at room temperature.

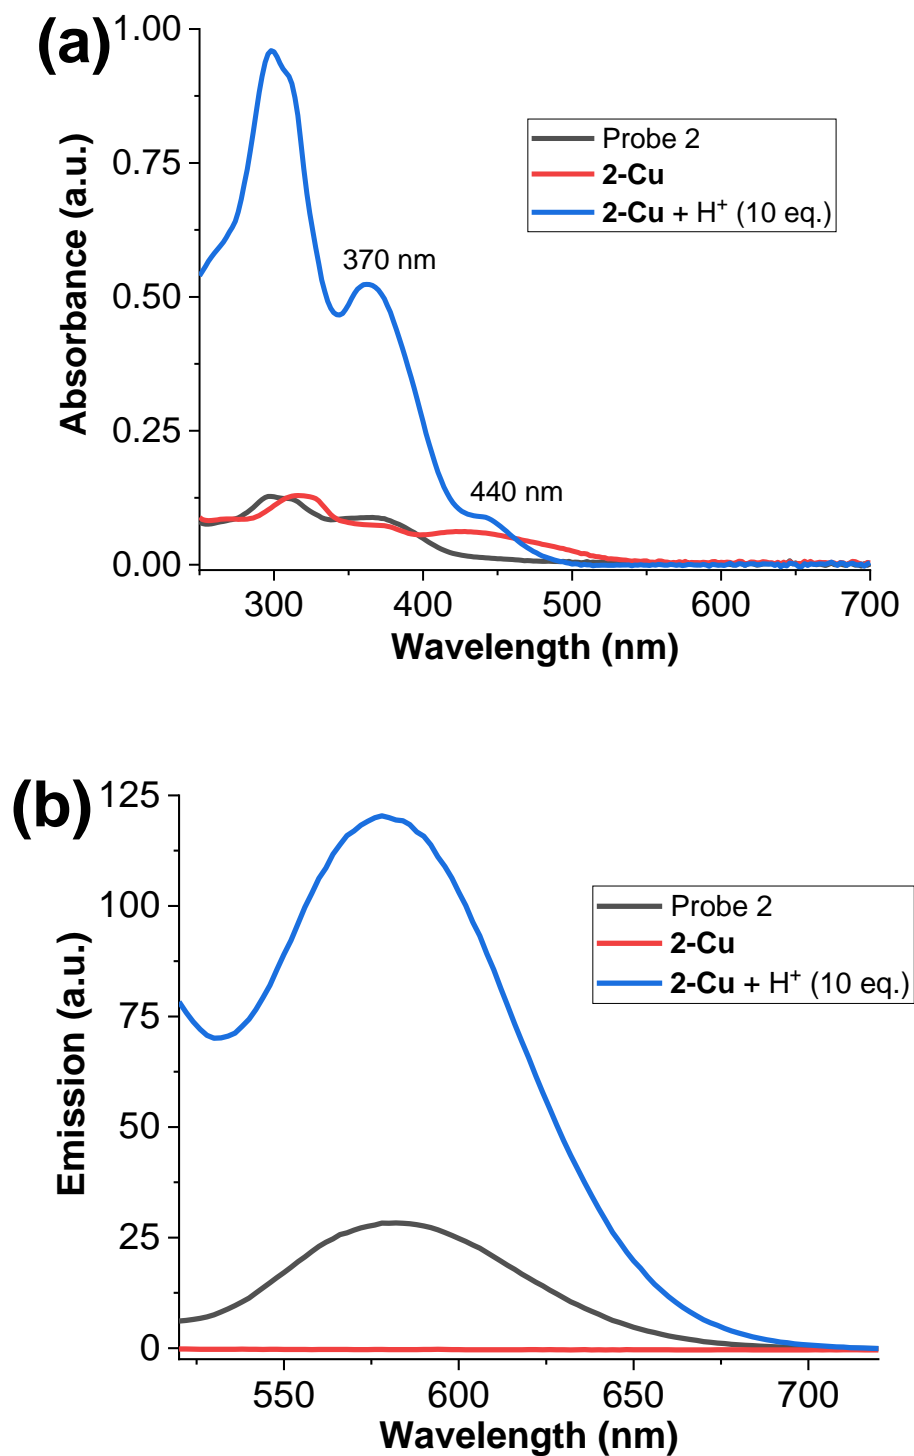

**Figure S5** The evaluation of the stability of the **2-Cu** complex (10  $\mu$ M in acetonitrile) by absorbance (a) and emission (b) in the presence of strong acid (HCl) at room temperature.

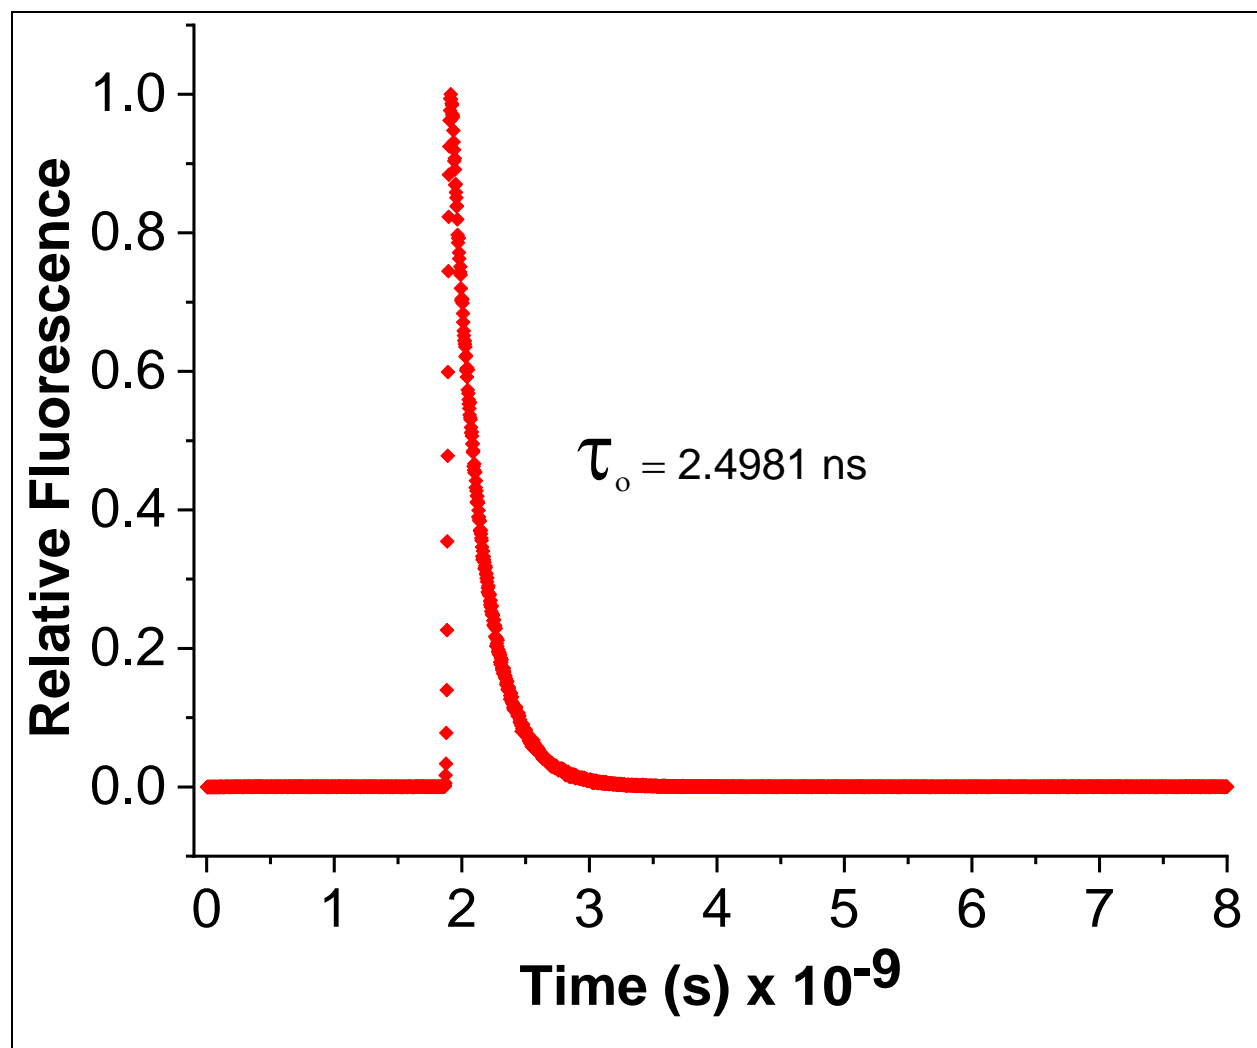

**Figure S6** The fluorescence life-time measurement for probe **2** (10  $\mu\text{M}$ ) in acetonitrile at 25  $^{\circ}\text{C}$ .
